# Supplementary material for: Synthesis of a novel and stable g-C3N4–Ag3PO4 hybrid nanocomposite photocatalyst and study of the photocatalytic activity under visible light irradiation
Source: Royal Society of Chemistry journal article supplement (doi:10.1039/c3ta00186e), 2013-01-01

## † Electronic supplementary information (ESI)

### Figure captions

Fig. S1 Flow charts for the synthesis of pure  $\text{Ag}_3\text{PO}_4$  and g-  $\text{C}_3\text{N}_4/\text{Ag}_3\text{PO}_4$  photocatalysts.

Fig. S2 Nitrogen adsorption-desorption isotherm, specific surface area and pore size distribution of as prepared a) CNAGPO25 and b) CNAGPO40 photocatalysts.

Fig.S3 XRD of reused CNAGPO25 photocatalyst for six successive experiments for photocatalytic degradation of MO in aqueous solution under visible light irradiation.

### Figures

Fig. S1

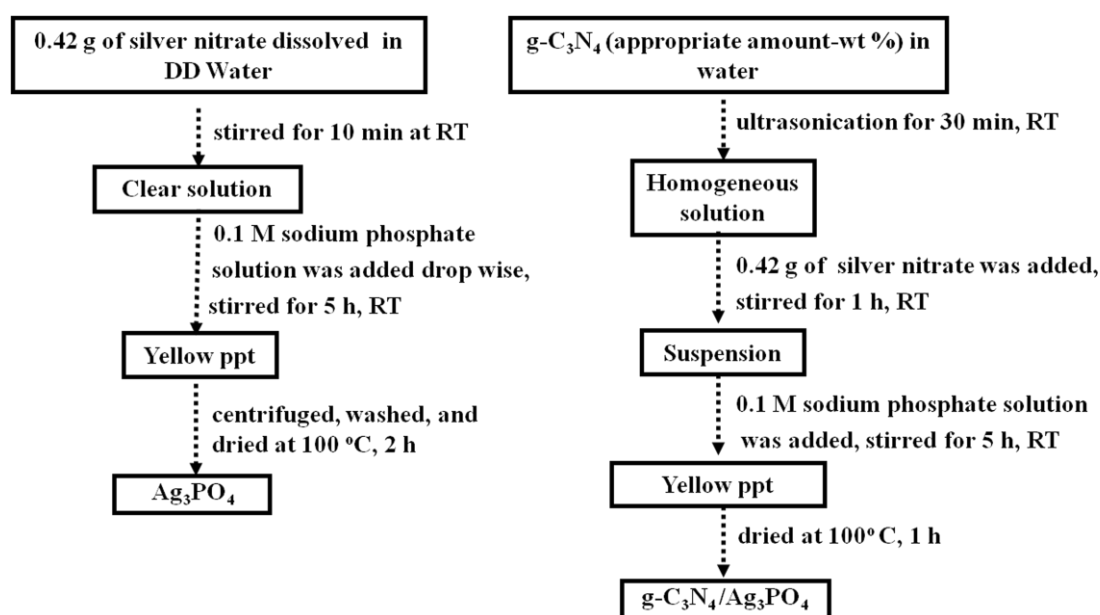

Fig. S2

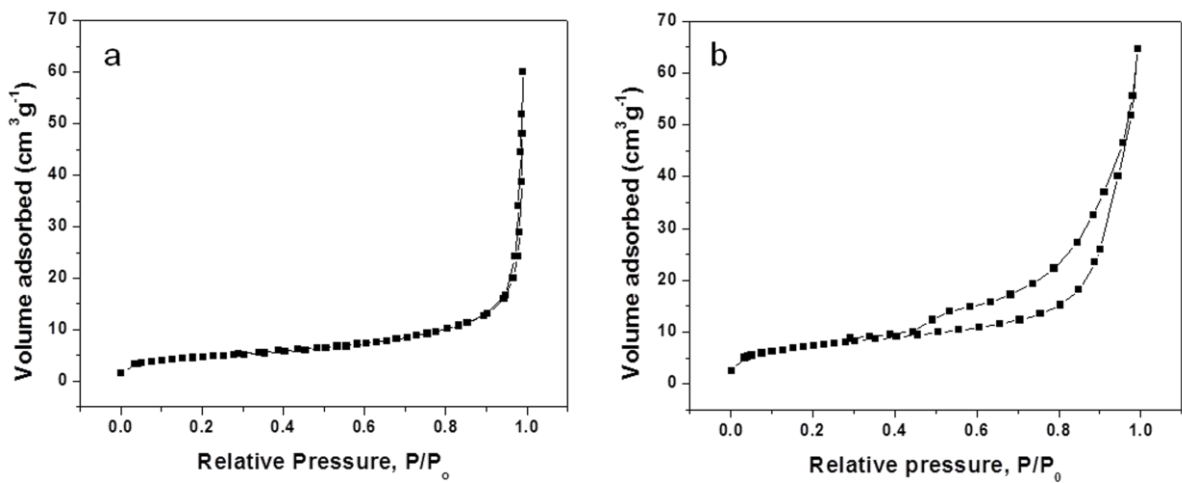

Fig. S3

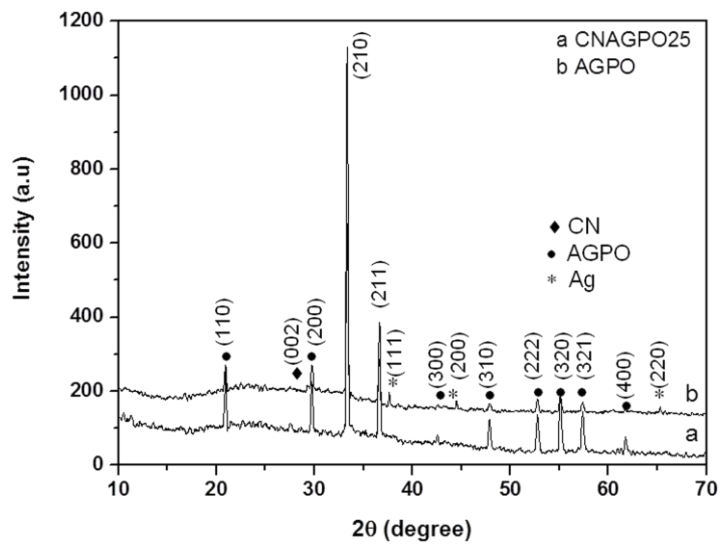

Supplement: c3ta00186e.pdf [file c3ta00186e.pdf]
